# Supplementary material for: Age and gender differences in meme humor: a multimodal variationist mixed-method approach
Source: publisher site journal article supplement (doi:10.1515/mc-2024-0051), 2024-10-10
Supplement: Supplementary file 1 [file j_mc-2024-0051_suppl_001.docx]

Image 1: Generations and Multimodal Linguistic Humor Types


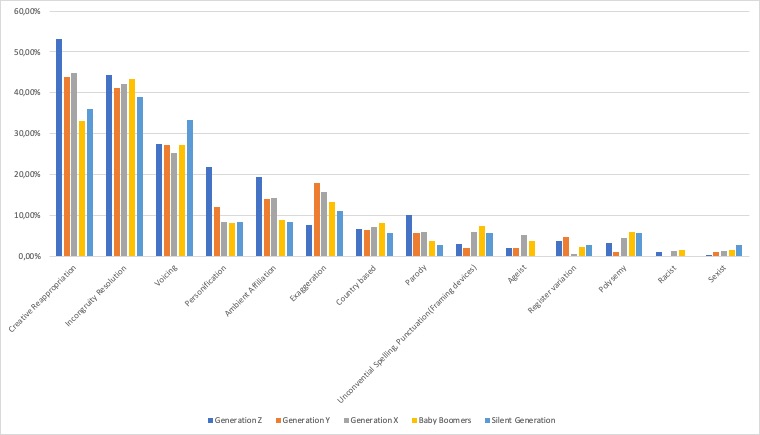


Supplementary material

Image 2: Generations

Image 3: Mosaic Plot: Humor Topics and Generations

Image 4 Languages of memes per generation


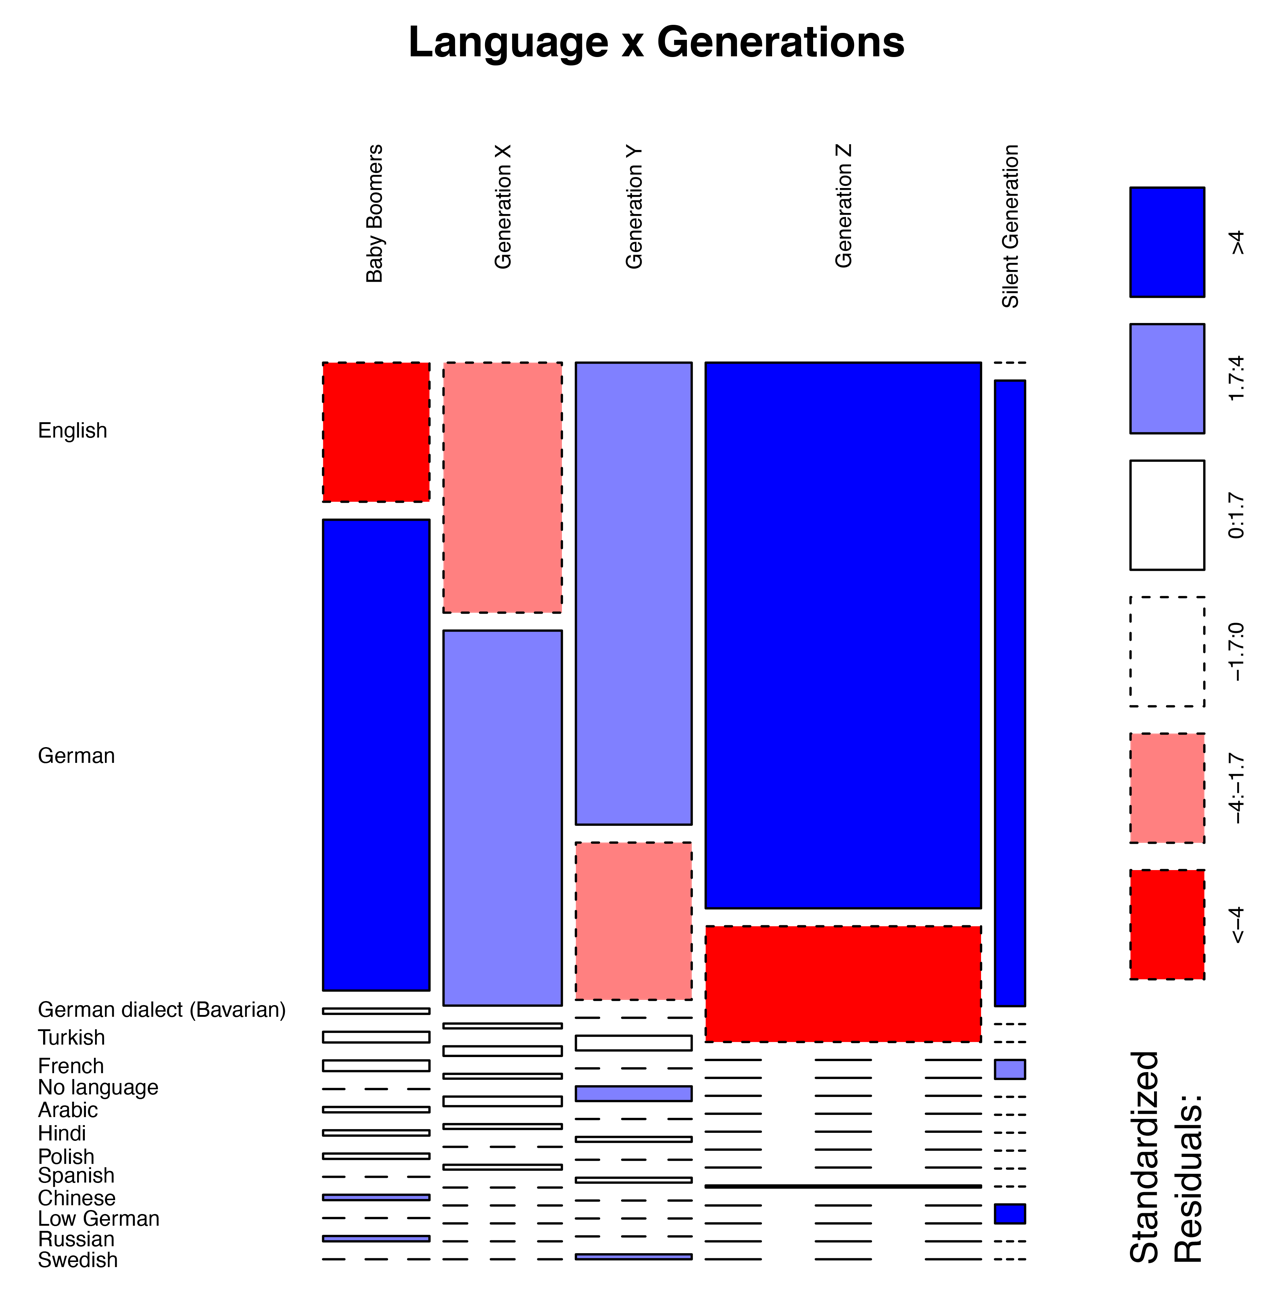


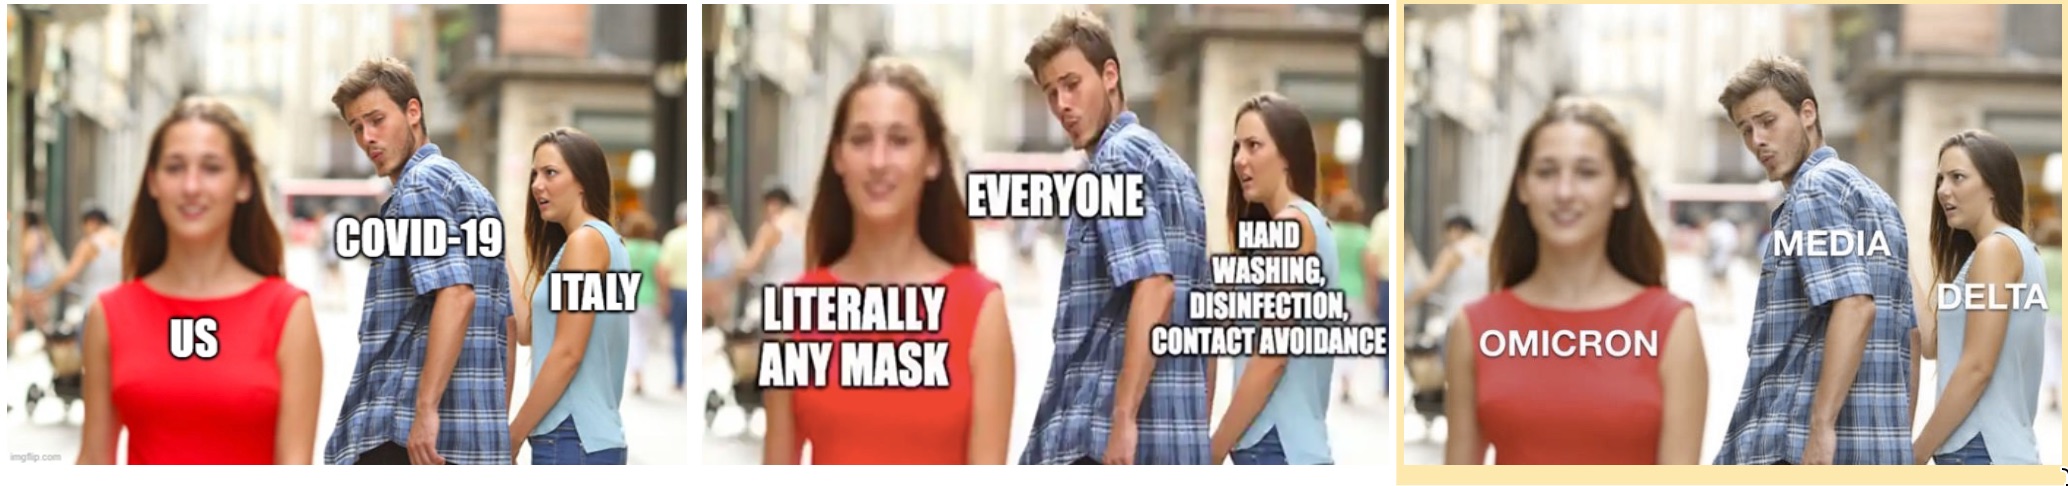


Panel 1: Variation of the distracted boyfriend meme

Source: https://knowyourmeme.com/memes/distracted-boyfriend


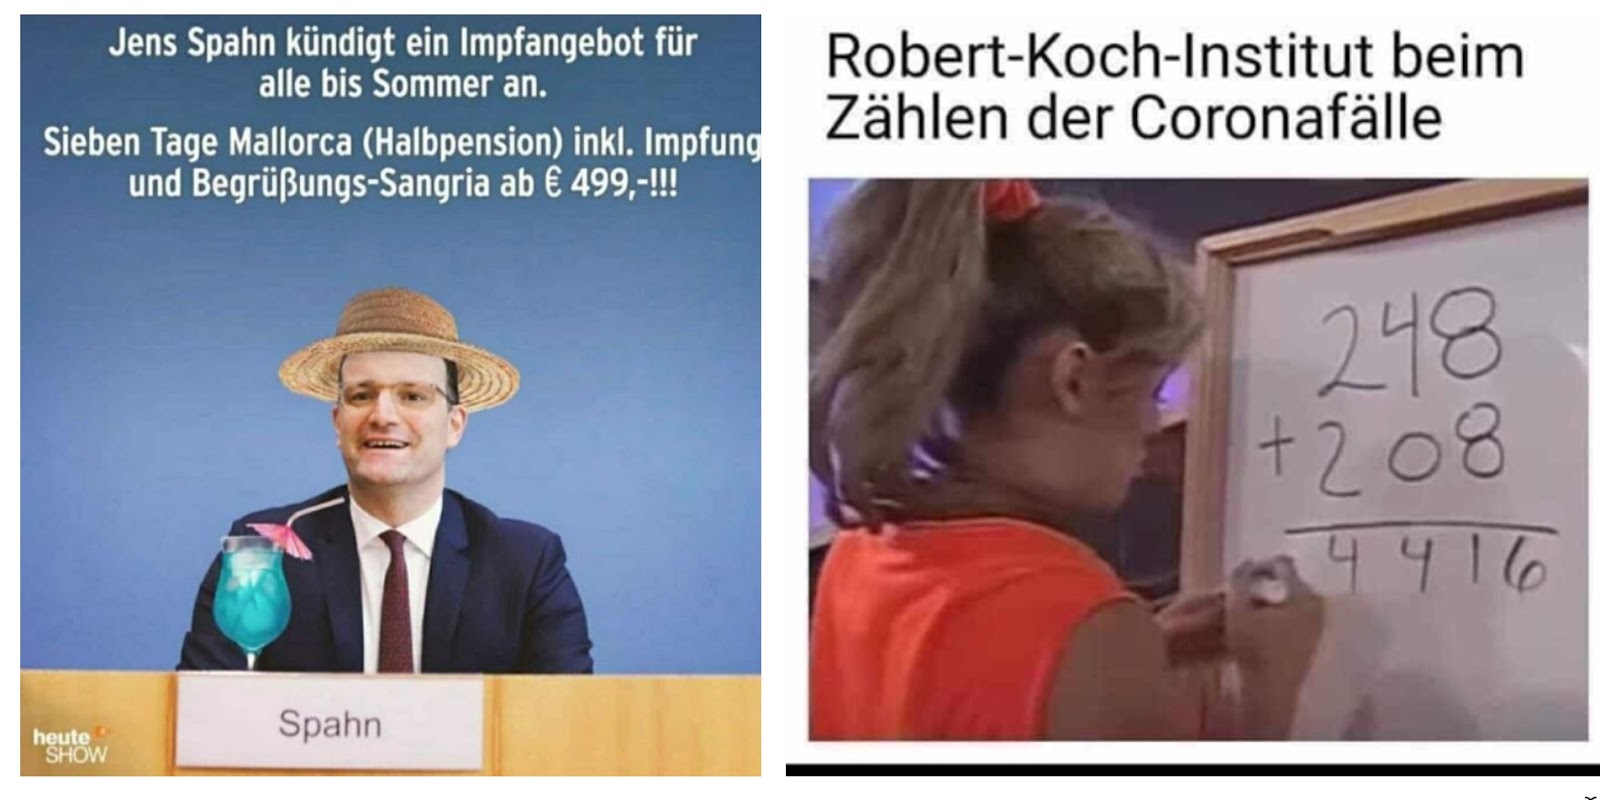


Panel 2

<https://www.facebook.com/Hessenschau/photos/?ref=page_internal>
